# Supplementary material for: TaABC1, a member of the activity of bc1 complex protein kinase family from common wheat, confers enhanced tolerance to abiotic stresses in Arabidopsis
Source: PubMed Central journal article supplement — J Exp Bot. 2010 Nov 29;62(3):1299–311. doi: 10.1093/jxb/erq377 (PMC3022413; doi:10.1093/jxb/erq377), 2010-11-29

***TaABC1*, a member of the activity of *bc<sub>1</sub>* complex protein kinase family from common wheat, confers enhanced tolerance to abiotic stresses in *Arabidopsis***

**Caixiang Wang, Ruilian Jing<sup>\*</sup>, Xinguo Mao, Xiaoping Chang, Ang Li**

The National Key Facility for Crop Gene Resources and Genetic Improvement,  
Institute of Crop Science, Chinese Academy of Agricultural Sciences, Beijing 100081,  
China

\* Corresponding author: Ruilian Jing

Tel/Fax: 86-10-82105829

Email: [jingrl@caas.net.cn](mailto:jingrl@caas.net.cn)

## Supplementary material

**Table S1. Primer pairs used in quantitative real-time PCR**

| Gene          | Accession number | Forward primer            | Reverse primer             |
|---------------|------------------|---------------------------|----------------------------|
| <i>DREB1A</i> | AT4G25480        | TGCGTTGGCGTTTCAGGATG      | CAAACCTCGGCATCTCAAACATCG   |
| <i>DREB2A</i> | AT5G05410        | CTGGAGAATGGTGCGGAAGA      | CAGATAGCGAATCCTGCTGTTGT    |
| <i>ABF3</i>   | AT4G34000        | CAACATCAGCAATGGTAATAGTGGA | CGTCCGAGGCAAGGTAAGTG       |
| <i>RD29A</i>  | At5G52310        | ATCACTTGGCTCCACTGTTGTTC   | ACAAAACACACATAAACATCCAAAGT |
| <i>CBF1</i>   | AT4G25490        | GTTTGGGATGCCGACTTTGTT     | ACCATCTCCTTCGCCGTCAT       |
| <i>KIN1</i>   | AT5G15960        | CCAACAAGAATGCCTTCCAAGC    | GCTGCCGCATCCGATACT         |
| <i>LEA</i>    | AT2G21490        | GAGCATCTTCGTCTGGTCTGGA    | CTCGTGAGGTTGGTCGGTAGTG     |
| <i>P5CS</i>   | AT3G55610        | AGCAGCCTGTAATGCGATGG      | AAGTGACGCCTTTGGTTTGC       |
| <i>Actin</i>  | AT3G18780        | TATCGCTGACCGTATGAGCAAAG   | TGGACCTGCCTCATCATACTCG     |
| <i>TaABC1</i> | HM773264         | GTTATGGTGCCTCGTGTGATTCC   | GGCCATAAGCAAGTGTAAGATCCG   |

## **Figure Legends and Figure**

### **Figure S1. Expression levels of *TaABC1* in different transgenic Arabidopsis lines**

The expression of *TaABC1* in OE2 line was regarded as the standard due to its lower level.

Fig. S1

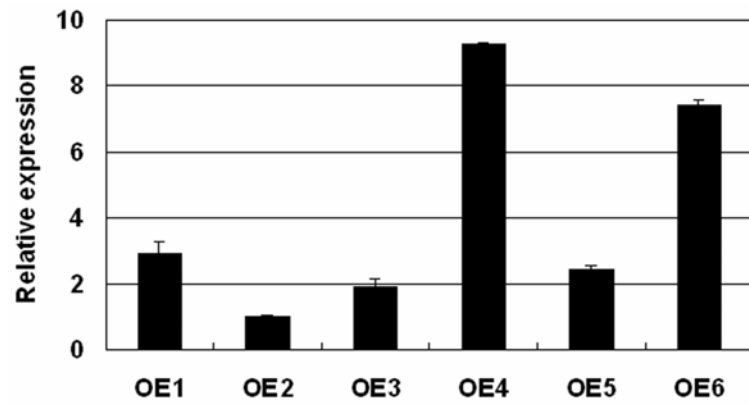

Supplement: supp_erq377_00053470-file001.pdf [file supp_erq377_00053470-file001.pdf]
